# Supplementary material for: Nipah Virus Sequences from Humans and Bats during Nipah Outbreak, Kerala, India, 2018
Source: PubMed Central journal article supplement (PMC6478210; doi:10.3201/eid2505.181076), 2019-05
Supplement: 18-1076-Techapp-s1.pdf [file 18-1076-Techapp-s1.pdf]

# Nipah Virus Sequences from Humans and Bats during Nipah Outbreak, Kerala, India, 2018

## Appendix

**Appendix Table.** Mutational analysis of the different Nipah virus isolates from Kerala state, India, with different genotype sequences

| Region, amino acid position | MH523642 | MH396625 | MH523641 | MH523640 | Indian<br>FJ513078 | Bangladesh<br>AY988601 | Malaysia<br>AF212302 |
|-----------------------------|----------|----------|----------|----------|--------------------|------------------------|----------------------|
| <b>Nucleoprotein</b>        |          |          |          |          |                    |                        |                      |
| 188                         | E        | E        | E        | E        | E                  | D                      | E                    |
| 211                         | Q        | Q        | Q        | Q        | R                  | Q                      | Q                    |
| 387                         | N        | N        | N        | N        | N                  | N                      | D                    |
| 429                         | V        | V        | V        | V        | V                  | V                      | I                    |
| 432                         | E        | E        | E        | E        | E                  | E                      | G                    |
| 457                         | D        | D        | D        | D        | D                  | D                      | N                    |
| 503                         | N        | N        | N        | N        | S                  | S                      | S                    |
| 505                         | R        | R        | R        | R        | K                  | K                      | R                    |
| 506                         | D        | D        | D        | D        | D                  | D                      | T                    |
| 508                         | R        | R        | R        | R        | R                  | R                      | G                    |
| 520                         | S        | S        | S        | S        | P                  | P                      | P                    |
| 521                         | T        | T        | T        | T        | T                  | T                      | A                    |
| <b>Phosphoprotein</b>       |          |          |          |          |                    |                        |                      |
| 41                          | R        | R        | R        | R        | R                  | R                      | Q                    |
| 69                          | G        | G        | G        | G        | G                  | G                      | D                    |
| 74                          | S        | S        | S        | S        | S                  | S                      | N                    |
| 139                         | H        | H        | H        | H        | H                  | H                      | Y                    |
| 140                         | S        | S        | S        | S        | S                  | S                      | T                    |
| 147                         | D        | D        | D        | D        | D                  | D                      | N                    |
| 156                         | V        | V        | V        | V        | V                  | V                      | M                    |
| 179                         | D        | D        | D        | D        | D                  | D                      | N                    |
| 183                         | A        | A        | A        | A        | A                  | A                      | T                    |
| 191                         | I        | I        | I        | I        | I                  | I                      | V                    |
| 195                         | P        | P        | P        | P        | P                  | P                      | L                    |
| 196                         | K        | K        | K        | K        | K                  | K                      | R                    |
| 200                         | V        | V        | V        | V        | V                  | V                      | D                    |
| 218                         | R        | R        | R        | R        | R                  | R                      | K                    |
| 219                         | G        | G        | G        | G        | E                  | E                      | E                    |
| 225                         | E        | E        | E        | E        | Q                  | Q                      | Q                    |
| 227                         | N        | N        | N        | N        | N                  | N                      | S                    |
| 228                         | R        | R        | R        | R        | K                  | R                      | R                    |
| 269                         | E        | E        | E        | E        | E                  | E                      | D                    |
| 275                         | A        | A        | A        | A        | A                  | A                      | V                    |
| 276                         | G        | G        | G        | G        | S                  | G                      | G                    |
| 277                         | R        | R        | R        | R        | R                  | R                      | G                    |
| 280                         | I        | I        | I        | I        | I                  | I                      | N                    |
| 283                         | V        | V        | V        | V        | V                  | V                      | I                    |
| 285                         | H        | H        | H        | H        | R                  | H                      | R                    |
| 286                         | I        | I        | I        | I        | I                  | I                      | T                    |
| 287                         | L        | L        | L        | L        | I                  | I                      | I                    |
| 292                         | T        | T        | T        | T        | T                  | T                      | I                    |
| 295                         | S        | S        | S        | S        | S                  | S                      | N                    |
| 297                         | K        | K        | K        | K        | Q                  | Q                      | Q                    |
| 298                         | I        | I        | I        | I        | I                  | I                      | A                    |
| 300                         | G        | G        | G        | G        | G                  | G                      | D                    |
| 303                         | P        | P        | P        | P        | P                  | P                      | S                    |
| 304                         | A        | A        | A        | A        | A                  | A                      | T                    |
| 306                         | A        | A        | A        | A        | A                  | A                      | V                    |
| 310                         | G        | G        | G        | G        | R                  | G                      | G                    |

| Region, amino acid position | MH523642 | MH396625 | MH523641 | MH523640 | Indian FJ513078 | Bangladesh AY988601 | Malaysia AF212302 |
|-----------------------------|----------|----------|----------|----------|-----------------|---------------------|-------------------|
| 311                         | L        | L        | L        | L        | P               | P                   | P                 |
| 319                         | K        | K        | K        | K        | K               | K                   | E                 |
| 320                         | S        | S        | S        | S        | S               | S                   | P                 |
| 343                         | Q        | Q        | Q        | Q        | Q               | Q                   | R                 |
| 351                         | F        | F        | F        | F        | F               | F                   | L                 |
| 354                         | S        | S        | S        | S        | S               | S                   | C                 |
| 363                         | L        | L        | L        | L        | L               | L                   | P                 |
| 365                         | Y        | Y        | Y        | Y        | Y               | Y                   | H                 |
| 366                         | R        | R        | R        | R        | R               | R                   | W                 |
| 367                         | S        | S        | S        | S        | G               | G                   | S                 |
| 370                         | G        | G        | G        | G        | G               | G                   | R                 |
| 372                         | R        | R        | R        | R        | R               | R                   | I                 |
| 380                         | T        | T        | T        | T        | T               | T                   | V                 |
| 381                         | D        | D        | D        | D        | D               | D                   | N                 |
| 382                         | S        | S        | S        | S        | S               | S                   | G                 |
| 386                         | N        | N        | N        | N        | T               | T                   | T                 |
| 388                         | D        | D        | D        | D        | N               | N                   | D                 |
| 389                         | K        | K        | K        | K        | K               | K                   | R                 |
| 410                         | E        | E        | E        | E        | E               | E                   | A                 |
| 421                         | L        | L        | L        | L        | P               | P                   | P                 |
| 425                         | N        | N        | N        | N        | S               | S                   | S                 |
| 449                         | R        | R        | R        | R        | Q               | Q                   | Q                 |
| 452                         | V        | V        | V        | V        | V               | V                   | A                 |
| 453                         | P        | P        | P        | P        | P               | P                   | S                 |
| 455                         | V        | V        | V        | V        | V               | V                   | A                 |
| 464                         | A        | A        | A        | A        | A               | A                   | V                 |
| 467                         | A        | A        | A        | A        | A               | A                   | V                 |
| 590                         | S        | S        | S        | S        | S               | S                   | N                 |
| 602                         | V        | V        | V        | V        | V               | V                   | I                 |
| 629                         | T        | T        | T        | T        | A               | A                   | A                 |
| 635                         | G        | G        | G        | G        | G               | G                   | E                 |
| 664                         | V        | V        | V        | V        | V               | V                   | I                 |
| 683                         | D        | D        | D        | D        | G               | G                   | G                 |
| 687                         | R        | R        | R        | R        | R               | R                   | K                 |
| Matrix                      |          |          |          |          |                 |                     |                   |
| 13                          | M        | M        | M        | M        | I               | M                   | M                 |
| 26                          | N        | N        | N        | N        | N               | N                   | H                 |
| 127                         | V        | V        | V        | V        | V               | V                   | I                 |
| 147                         | G        | G        | G        | G        | G               | G                   | S                 |
| 331                         | V        | V        | V        | V        | V               | V                   | I                 |
| Fusion                      |          |          |          |          |                 |                     |                   |
| 2                           | A        | A        | A        | A        | A               | A                   | V                 |
| 6                           | N        | N        | N        | N        | N               | N                   | D                 |
| 9                           | Y        | Y        | Y        | Y        | Y               | Y                   | C                 |
| 11                          | S        | S        | S        | S        | S               | S                   | C                 |
| 15                          | L        | L        | L        | L        | I               | I                   | I                 |
| 19                          | M        | M        | M        | M        | I               | M                   | M                 |
| 42                          | I        | I        | I        | I        | I               | I                   | V                 |
| 207                         | L        | L        | L        | L        | L               | S                   | L                 |
| 252                         | D        | D        | D        | D        | D               | G                   | D                 |
| 273                         | G        | G        | G        | G        | G               | G                   | I                 |
| Glycoprotein                |          |          |          |          |                 |                     |                   |
| 3                           | T        | T        | T        | T        | T               | T                   | A                 |
| 5                           | S        | S        | S        | S        | S               | S                   | N                 |
| 14                          | A        | A        | A        | A        | A               | A                   | T                 |
| 20                          | N        | N        | N        | N        | N               | N                   | I                 |
| 82                          | M        | M        | M        | M        | M               | M                   | V                 |
| 89                          | S        | S        | S        | S        | S               | S                   | G                 |
| 172                         | K        | K        | K        | K        | K               | K                   | R                 |
| 236                         | K        | K        | K        | K        | K               | K                   | R                 |
| 274                         | S        | S        | S        | S        | S               | S                   | P                 |
| 288                         | S        | S        | S        | S        | N               | N                   | N                 |
| 299                         | V        | V        | V        | V        | V               | V                   | T                 |
| 304                         | I        | I        | I        | I        | V               | I                   | I                 |
| 325                         | N        | N        | N        | N        | N               | N                   | S                 |
| 328                         | E        | E        | E        | E        | E               | E                   | G                 |
| 329                         | S        | S        | S        | S        | S               | S                   | G                 |
| 335                         | F        | F        | F        | F        | F               | F                   | L                 |

| Region, amino acid position | MH523642 | MH396625 | MH523641 | MH523640 | Indian FJ513078 | Bangladesh AY988601 | Malaysia AF212302 |
|-----------------------------|----------|----------|----------|----------|-----------------|---------------------|-------------------|
| 339                         | N        | N        | N        | N        | N               | N                   | S                 |
| 344                         | R        | R        | R        | R        | K               | K                   | R                 |
| 384                         | V        | V        | V        | V        | I               | I                   | I                 |
| 385                         | A        | A        | A        | A        | A               | A                   | T                 |
| 386                         | K        | K        | K        | K        | E               | E                   | T                 |
| 421                         | E        | E        | E        | E        | E               | E                   | G                 |
| 424                         | S        | S        | S        | S        | S               | S                   | P                 |
| 426                         | I        | I        | I        | I        | I               | I                   | V                 |
| 427                         | I        | I        | I        | I        | V               | V                   | V                 |
| 470                         | Q        | Q        | Q        | Q        | Q               | Q                   | L                 |
| 481                         | D        | D        | D        | D        | D               | D                   | N                 |
| 498                         | T        | T        | T        | T        | K               | K                   | T                 |
| 502                         | V        | V        | V        | V        | V               | V                   | I                 |
| 545                         | V        | V        | V        | V        | V               | V                   | I                 |
| L protein                   |          |          |          |          |                 |                     |                   |
| 36                          | K        | K        | K        | K        | K               | K                   | R                 |
| 71                          | N        | N        | N        | N        | N               | N                   | D                 |
| 77                          | V        | V        | V        | V        | V               | V                   | I                 |
| 94                          | T        | T        | T        | T        | I               | T                   | I                 |
| 112                         | K        | K        | K        | K        | K               | R                   | K                 |
| 252                         | I        | I        | I        | I        | I               | I                   | V                 |
| 533                         | D        | D        | D        | D        | D               | D                   | E                 |
| 621                         | K        | K        | K        | K        | K               | K                   | R                 |
| 625                         | C        | C        | C        | C        | C               | C                   | Y                 |
| 632                         | N        | N        | N        | N        | N               | S                   | N                 |
| 639                         | N        | N        | N        | N        | N               | D                   | N                 |
| 642                         | Y        | Y        | Y        | Y        | Y               | Y                   | N                 |
| 658                         | Y        | Y        | Y        | Y        | Y               | Y                   | H                 |
| 665                         | T        | T        | T        | T        | T               | I                   | I                 |
| 703                         | K        | K        | K        | K        | K               | K                   | R                 |
| 783                         | E        | E        | E        | E        | E               | E                   | K                 |
| 890                         | V        | V        | V        | V        | V               | V                   | I                 |
| 1154                        | I        | I        | I        | I        | I               | I                   | L                 |
| 1157                        | R        | R        | R        | R        | R               | R                   | K                 |
| 1181                        | K        | K        | K        | K        | K               | K                   | R                 |
| 1262                        | R        | R        | R        | R        | K               | K                   | R                 |
| 1494                        | A        | A        | A        | A        | A               | A                   | V                 |
| 1551                        | A        | A        | A        | A        | A               | A                   | S                 |
| 1577                        | I        | I        | I        | I        | I               | I                   | V                 |
| 1645                        | Y        | Y        | Y        | Y        | Y               | Y                   | S                 |
| 1658                        | N        | N        | N        | N        | N               | N                   | S                 |
| 1707                        | M        | M        | M        | M        | M               | M                   | V                 |
| 1748                        | I        | I        | I        | I        | I               | V                   | I                 |
| 1791                        | S        | S        | S        | S        | S               | S                   | A                 |
| 1801                        | K        | K        | K        | K        | K               | K                   | R                 |
| 1896                        | A        | A        | A        | A        | A               | A                   | T                 |
| 2027                        | I        | I        | I        | I        | I               | I                   | V                 |
| 2031                        | R        | R        | R        | R        | R               | R                   | K                 |
| 2037                        | N        | N        | N        | N        | D               | D                   | N                 |
| 2064                        | E        | E        | E        | E        | E               | E                   | D                 |
| 2071                        | H        | H        | H        | H        | H               | H                   | Q                 |
| 2159                        | R        | R        | R        | R        | R               | R                   | C                 |
| 2216                        | S        | S        | S        | S        | S               | S                   | N                 |
